# Supplementary material for: In-situ synthesis of poly(dimethylsiloxane)–gold nanoparticles composite films and its application in microfluidic systems
Source: Royal Society of Chemistry journal article supplement (doi:10.1039/b716295m), 2008-01-01
Supplement: b716295m.pdf [file b716295m.pdf]

## Electronic supplementary information

### In-situ synthesis of poly(dimethylsiloxane)/gold nanoparticles composite films and its application in microfluidic systems

Qing Zhang, Jing-Juan Xu\*, Yan Liu, and Hong-Yuan Chen\*

Key Laboratory of Analytical Chemistry for Life Sciences, School of Chemistry and  
Chemical Engineering, Nanjing University, Nanjing, 210093 China.

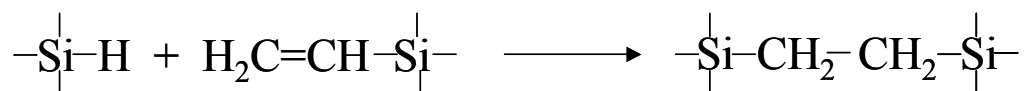

Scheme 1S. Crosslinking reaction between the curing agent and the monomer of PDMS.

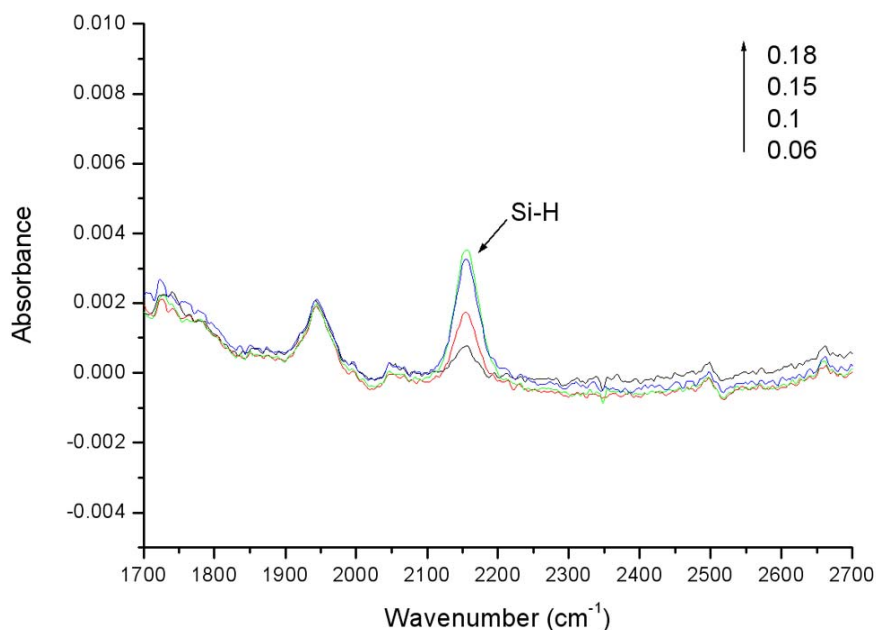

Fig. 1S. Comparison of ATR-FT-IR spectra of the PDMS film with different mass ratios ( $\eta$ ) of the curing agent and the monomer of PDMS.

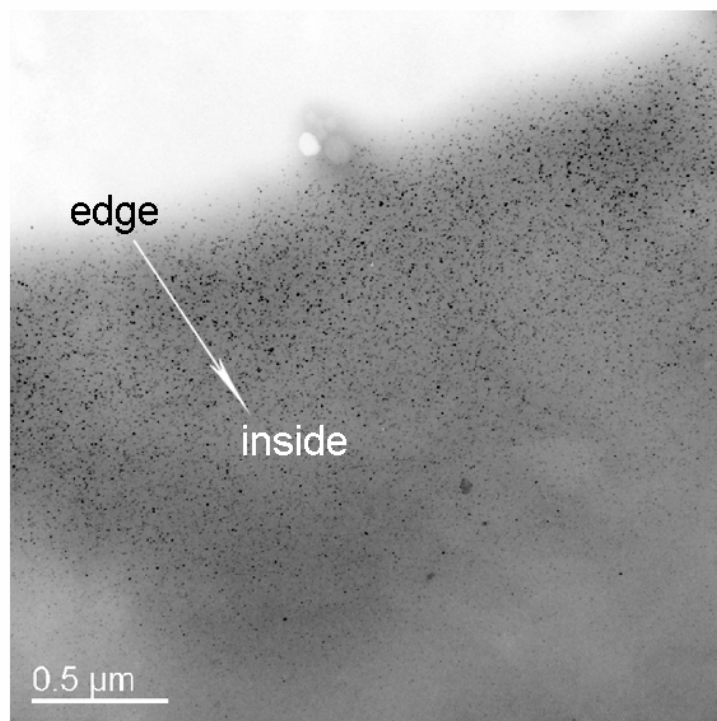

Fig. 2S TEM image of the cross section of the gold nanoparticles/PDMS free-standing films.  $\eta$  was 0.06.

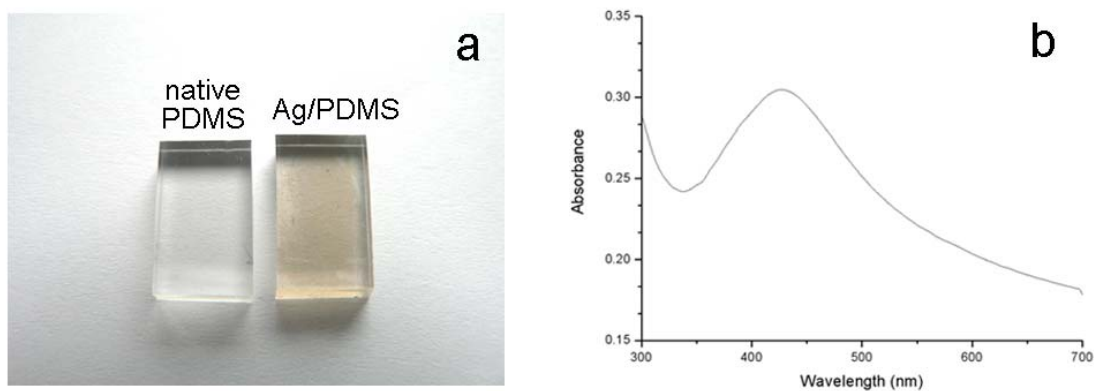

Fig. 3S. Photographic image (a) and UV-vis spectra (b) of Ag nanoparticles/PDMS free-standing film ( $\eta = 0.1$ , incubation time = 48 h).
